# Supplementary material
Source: PubMed Central journal article supplement (PMC1748193)
Supplement: pnas_0510836103_4.pdf [file pnas_0510836103_4.pdf]

**Table 1. Genotype differences between children of African-American and other ethnicities**

|           |                   |                    | Genotype |       |       | Total  |
|-----------|-------------------|--------------------|----------|-------|-------|--------|
|           |                   |                    | AA       | AT    | TT    |        |
| Ethnicity | Asian             | Count              | 3        | 1     | 0     | 4      |
|           |                   | % within ethnicity | 75.0%    | 25.0% | .0%   | 100.0% |
|           | African-American  | Count              | 2        | 5     | 6     | 13     |
|           |                   | % within ethnicity | 15.4%    | 38.5% | 46.2% | 100.0% |
|           | Hispanic          | Count              | 7        | 5     | 0     | 12     |
|           |                   | % within ethnicity | 58.3%    | 41.7% | .0%   | 100.0% |
|           | European-American | Count              | 63       | 51    | 11    | 125    |
|           |                   | % within ethnicity | 50.4%    | 40.8% | 8.8%  | 100.0% |
| Total     |                   | Count              | 75       | 62    | 17    | 154    |
|           |                   | % within ethnicity | 48.7%    | 40.3% | 11.0% | 100.0% |
