# Supplementary material
Source: PubMed Central journal article supplement (PMC1748193)
Supplement: pnas_0510836103_5.pdf [file pnas_0510836103_5.pdf]

**Table 2. Genotype differences between the Emory controls and McLean and Vanderbilt clinical sites**

|      |                       |            | Genotype    |             |             | Total         |
|------|-----------------------|------------|-------------|-------------|-------------|---------------|
|      |                       |            | AA          | AT          | TT          |               |
| Site | Emory Controls        | Count<br>% | 36<br>60.0% | 21<br>35.0% | 3<br>5.0%   | 60<br>100.0%  |
|      | McLean ADHD Cases     | Count<br>% | 7<br>26.9%  | 12<br>46.2% | 7<br>26.9%  | 26<br>100.0%  |
|      | Vanderbilt ADHD Cases | Count<br>% | 32<br>47.1% | 29<br>42.6% | 7<br>10.3%  | 68<br>100.0%  |
|      | Total                 | Count<br>% | 75<br>48.7% | 62<br>40.3% | 17<br>11.0% | 154<br>100.0% |
