# Supplementary material
Source: PubMed Central journal article supplement (PMC1748193)

**A**

-3072 ACCCCTTTG<sup>\*</sup>ACCACGAGTC -3090

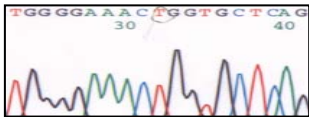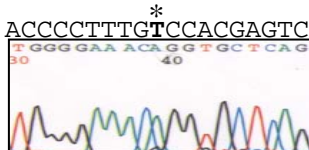**B**

A/A

A/T

T/T

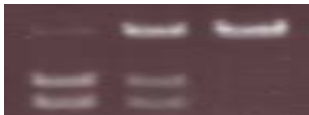

Supplement: pnas_0510836103_1.pdf [file pnas_0510836103_1.pdf]

*SK-N-BE(2)C*

*SK-N-BE(2)M17*

*JURKAT*

*HeLa*

*HT1080*

*HEK293*

*HepG2*

**Scratch**

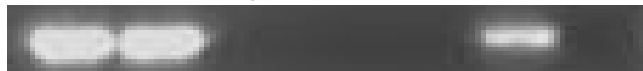

**Slug**

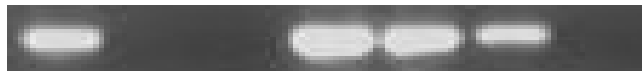

**NET**

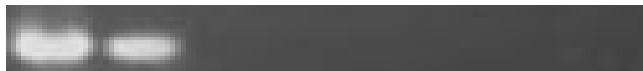

**$\beta$ -Actin**

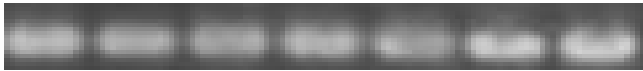

Supplement: pnas_0510836103_2.pdf [file pnas_0510836103_2.pdf]

|                   |   |   |   |   |   |   |   |   |
|-------------------|---|---|---|---|---|---|---|---|
| T probe           | - | + | - | + | - | + | - | + |
| A probe           | + | - | + | - | + | - | + | - |
| IVT- $\delta$ EF1 | + | + | - | - | - | - | - | - |
| IVT-Snail         | - | - | + | + | - | - | - | - |
| IVT-Slug          | - | - | - | - | + | + | - | - |
| IVT-Scrt          | - | - | - | - | - | - | + | + |

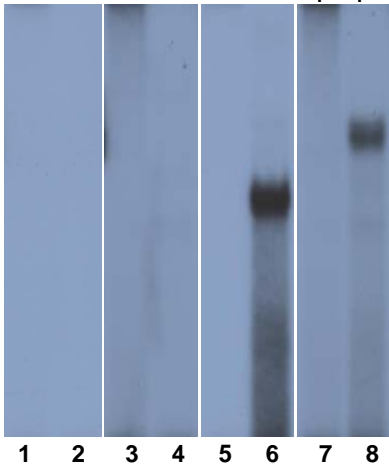

Supplement: pnas_0510836103_3.pdf [file pnas_0510836103_3.pdf]
